# Supplementary material
Source: publisher site journal article supplement (https://www.dovepress.com/article/supplementary_file/602902/602902%20Appendix%20File.docx)
Supplement: Supplementary file 1 [file 602902%20Appendix%20File.docx]

**Appendix Ⅰ. Measurement scales of the study**

| Construct | Items | Source |
| --- | --- | --- |
| Online cross-cutting interactions | How often do you interact with the following individuals on Weibo? | Heatherly et al (2017) |
|  | …people with different opinions | Lin & Kim (2023) |
|  | …people with different thinking pattern |  |
|  | …people with a different set of values |  |
| Online like-minded interactions | How often do you interact with the following individuals on Weibo? | Heatherly et al (2017) |
|  | …people with similar opinions | Lin & Kim (2023) |
|  | …people with similar thinking pattern |  |
|  | …people with a similar set of values |  |
| Cognitive empathy | I try to look at everybody's side of a disagreement before I make a decision. | Davis (1983) |
|  | I sometimes try to understand my friends better by imagining how things look from their perspective. |  |
|  | Before criticizing somebody, I try to imagine how I would feel if I were in their place. |  |
|  | I believe that there are two sides to every question and try to look at them both. |  |
| Affective empathy | I often have tender, concerned feelings for people less fortunate than me. |  |
|  | I am often quite touched by things that I see happen. |  |
|  | I would describe myself as a pretty soft-hearted person. |  |
|  | When I'm upset at someone, I usually try to put myself in his shoes for a while. |  |
| Prosocial tendencies | I am very warm-hearted to those who need help. | Carlo & Randall (2002) |
|  | I would like to share my things with my friends. | Zhan et al (2023) |
|  | I can help those in need in voluntary activities. |  |
|  | I try to get close to and take care of those in need. |  |
|  | I will try my best to help others avoid getting into trouble. |  |
|  | I am easy to lend money or other things. |  |
|  | I would like my knowledge and ability to benefit others. |  |
|  | I am happy to help my friends or colleagues in the activities. |  |
| Online exposure to prosocial content | How often are you exposed to the following prosocial content on Weibo? | Li et al (2022) |
|  | …friendly content |  |
|  | …supportive content |  |
|  | …uplifting content |  |
